# Supplementary material for: A novel mouse model of Duchenne muscular dystrophy carrying a multi-exonic Dmd deletion exhibits progressive muscular dystrophy and early-onset cardiomyopathy
Source: Oxford University Press journal article supplement (doi:10.1242/dmm.045369), 2020-09-01
Supplement: dmm045369supp.pdf [file dmm045369supp.pdf]

## Supplementary Figures

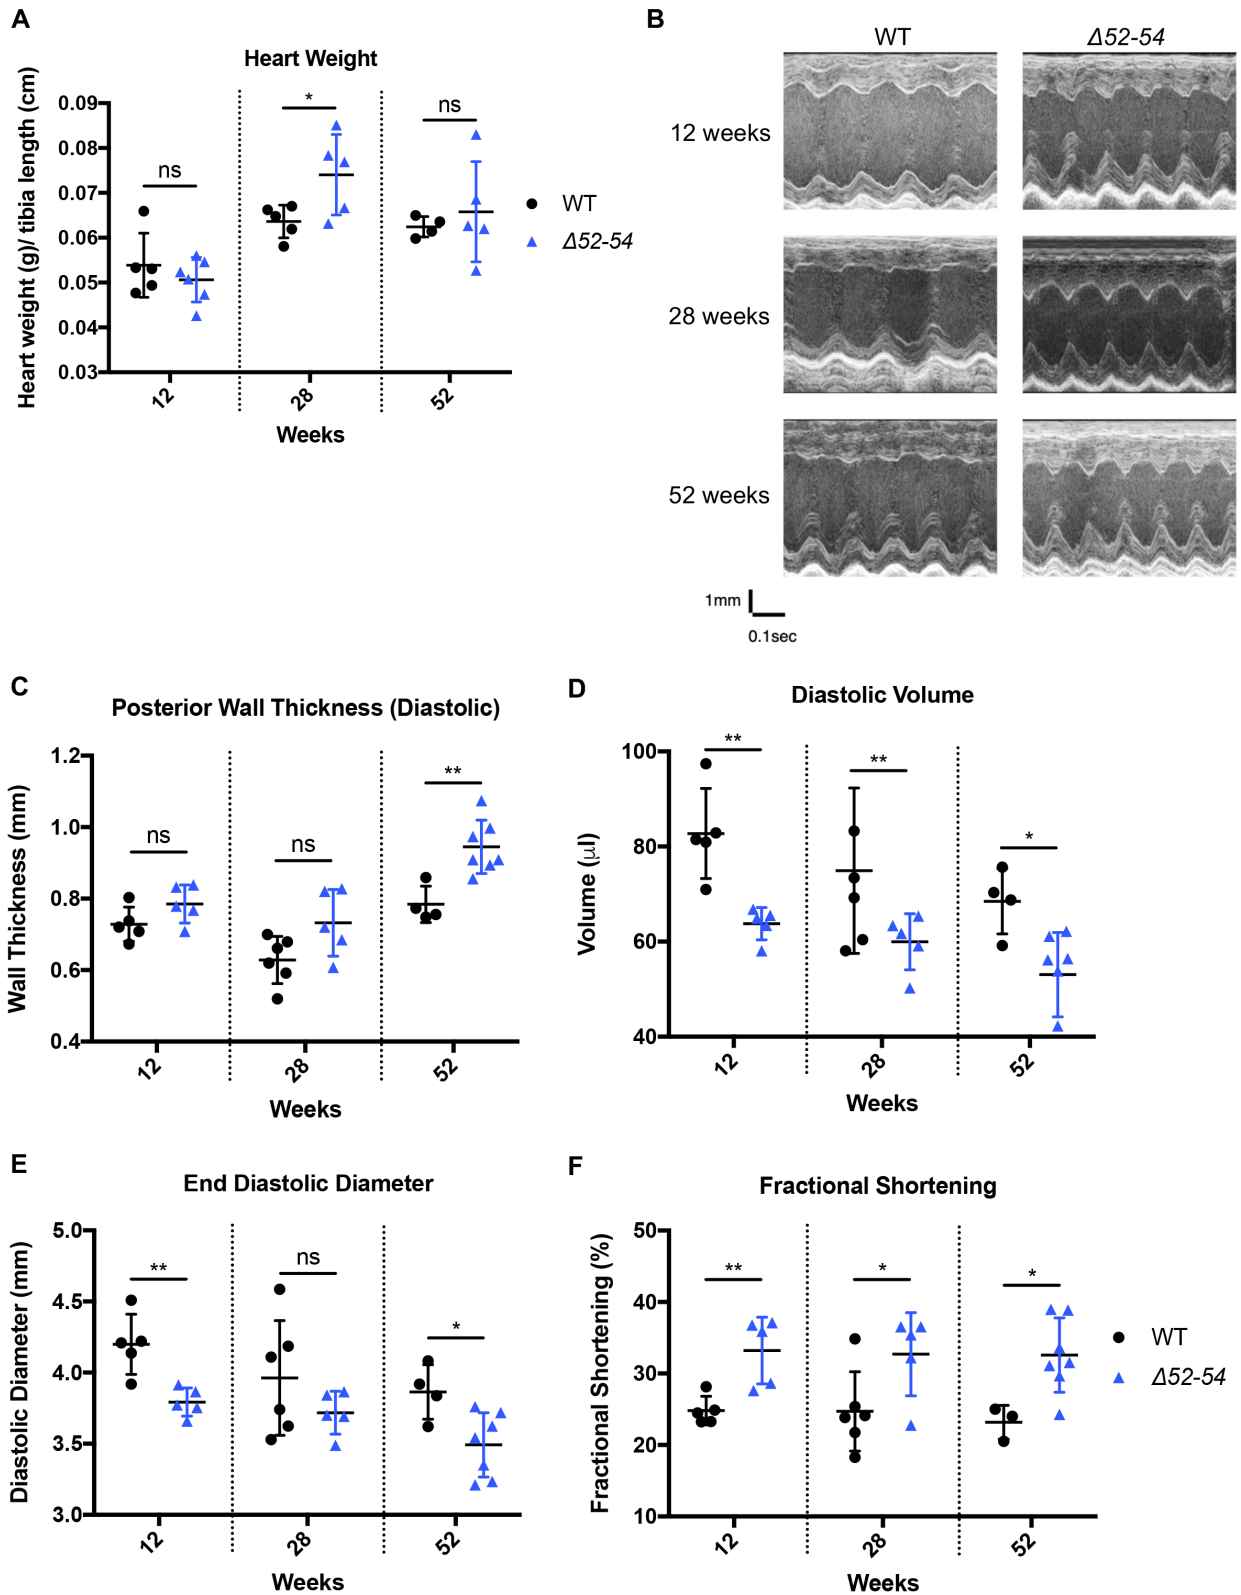

**Figure S1. *Dmd*  $\Delta$ 52-54 present cardiac hypertrophy while the heart in *Dmd*  $\Delta$ 52-55 are unaffected.** (A) Heart weight of wildtype and *Dmd*  $\Delta$ 52-54 mice at 12, 28, and 52 weeks were normalized to respective tibia lengths. (B) Representative M-mode tracing of the left ventricle in wildtype and *Dmd*  $\Delta$ 52-54 mice at 12, 28, and 52 weeks. The heart in wildtype (WT) and *Dmd*  $\Delta$ 52-54 ( $\Delta$ 52-54) mice were analyzed using echocardiography to determine the diastolic measurements (C) left ventricular posterior wall thickness, (D) left ventricular volume, and (E) left ventricular end diameter, as well as (F) fractional shortening. All data is represented as the mean  $\pm$  S.D. Statistical analyses were performed with Student's t-test. \*P < 0.05, \*\* P < 0.01.
